# Supplementary material for: Prognostic Biomarkers in Guillain-Barré Syndrome: Lymphocyte-Based Ratio and Albumin Level
Source: Research Square preprint supplement (doi:10.21203/rs.3.rs-8784464/v1), 2026-02-24
Supplement: Supplementary file 1 [file 2fc5889b6a0d6e1f6bc94ed8.docx]

Table 3. Comparison of serologic, hematologic and CSF parameters among patients based on disease severity

|  | Baseline severity | | | Respiratory failure | | | Long-term outcome | | |
| --- | --- | --- | --- | --- | --- | --- | --- | --- | --- |
|  | Severe  (n=91) | Mild  (n=35) | p-value | Yes  (n=19) | No  (n=107) | p-value | Poor  (n=23) | Good  (n=103) | p-value |
| Albumin_B (n=126) | 4.04±0.41 | 4.16±0.45 | ns | 3.98±0.47 | 4.09±0.41 | ns | 3.89±0.40 | 4.12±0.41 | 0.023* |
| Albumin_2 (n=81) | 3.44±0.46 | 3.61±0.41 | ns | 3.01±0.32 | 3.60±0.40 | <0.001* | 3.12±0.46 | 3.57±0.41 | 0.001* |
| CRP | 0.80±1.42 | 0.55±1.05 | ns | 0.78±0.83 | 0.73±1.41 | ns | 0.90±0.87 | 0.70±1.42 | ns |
| CAR | 0.21±0.41 | 0.15±0.32 | ns | 0.20±0.19 | 0.19±0.42 | ns | 0.23±0.19 | 0.19±0.42 | ns |
| NLR | 3.34±2.04 | 2.92±1.62 | ns | 4.52±3.02 | 2.99±1.60 | 0.004* | 3.96±2.89 | 3.06±1.64 | 0.025* |
| MLR | 0.31±0.18 | 0.24±0.13 | ns | 0.37±0.26 | 0.28±0.15 | ns | 0.35±0.26 | 0.28±0.14 | 0.033* |
| CSF total  protein (mg/dL) | 65.7±51.5 | 47.1±28.8 | 0.036* | 61.6±36.0 | 60.3±48.6 | ns | 72.58±66.44 | 57.9±41.6 | ns |

Abbreviations: Albumin_B, serum albumin level (mg/dL) within 24 hours after admission; Albumin_2, after 2 weeks; CRP, C-reactive protein; CAR, CRP to albumin ratio; NLR, neutrophil to lymphocyte ratio; MLR, monocyte to lymphocyte ratio; CSF, cerebrospinal fluid.

*, *p* value < 0.05
