# Supplementary material for: Prognostic Biomarkers in Guillain-Barré Syndrome: Lymphocyte-Based Ratio and Albumin Level
Source: Research Square preprint supplement (doi:10.21203/rs.3.rs-8784464/v1), 2026-02-24
Supplement: Supplementary file 2 [file 2ff85d234f5aa7223ab70527.docx]

Table 4. Logistic regression analysis of prognostic factors for respiratory failure and long-term outcome of GBS patients

| Variables | Respiratory Failure | | | | Long-term Outcome | | | |
| --- | --- | --- | --- | --- | --- | --- | --- | --- |
|  | Un-adjusted  OR (95% CI) | p-value | Adjusted-OR (95% CI) | p-value | Un-adjusted OR (95% CI) | p-value | Adjusted-OR (95% CI) | p-value |
| Age | 1.03 (0.99-1.06) | 0.104 | 0.96 (0.90-1.01) | 0.319 | 1.07 (1.03-1.11) | 0.004* | 1.04 (0.99-1.08) | 0.091 |
| Sex | 1.19 (0.42-3.39) | 0.740 | 1.97 (0.38-10.2) | 0.853 | 1.65 (0.60-4.56) | 0.329 | 3.62 (0.86-15.2) | 0.079 |
| NLR | 1.41 (1.10-1.80) | 0.010* | 1.52 (1.11-2.09) | 0.090* | 1.23 (0.99-1.52) | 0.059 | 1.19 (0.85-1.66) | 0.288 |
| MLR | 12.16 (0.97-151.1) | 0.052 | 2.67 (0.09-81.7) | 0.574 | 10.27(0.90-116) | 0.060 | 0.14 (0.00-7.0) | 0.325 |
| CAR | 1.03 (0.30-3.52) | 0.953 | 0.75 (0.18-3.16) | 0.151 | 1.27 (0.46-3.51) | 0.643 | 0.78 (0.13-4.59) | 0.790 |
| Albumin_B | 0.53 (0.16-1.68) | 0.282 | 0.65 (0.11-3.79) | 0.827 | 0.28 (0.09-0.86) | 0.112 | 0.32 (0.07-1.38) | 0.128 |
| Albumin_2 | 0.01 (0.00-0.09) | 0.000* | 0.003 (0.00-0.05) | 0.000* | 0.10 (0.02-0.40) | 0.001* | 0.14 (0.03-0.65) | 0.012* |
| Bulbar | (0.00-0.00) | 0.000* | 6.30 (0.00-) | 0.994 | 3.02 (1.20-7.62) | 0.019* | 1.81 (0.45-7.26) | 0.401 |
| Sensory | 0.75 (0.23-2.46) | 0.638 | 1.33 (0.38-4.69) | 0.656 | 0.53 (0.13-2.24) | 0.389 | 0.51 (0.12-2.09) | 0.348 |
| Facial palsy | 0.81 (0.24-2.71) | 0.732 | 1.59 (0.44-5.78) | 0.476 | 0.53 (0.10-2.90) | 0.465 | 0.48 (0.45-7.26) | 0.477 |
| Delayed facial palsy | 1.65 (0.19-13.8) | 0.643 | 0.07 (0.00-2.76) | 0.158 | 0.37 (0.03-4.34) | 0.429 | 0.31 (0.26-3.72) | 0.355 |

NLR, neutrophil to lymphocyte ratio; MLR, monocyte to lymphocyte ratio; CAR, CRP to albumin ratio; Albumin_B, serum albumin level (mg/dL) within 24 hours after admission; Albumin_2, serum albumin level (mg/dL) after 2 weeks.

*, *p* value < 0.05
