# Supplementary material for: Prognostic Biomarkers in Guillain-Barré Syndrome: Lymphocyte-Based Ratio and Albumin Level
Source: Research Square preprint supplement (doi:10.21203/rs.3.rs-8784464/v1), 2026-02-24
Supplement: Supplementary file 3 [file 593b389e56d2d8806aa651de.docx]

Table 1. Comparison of demographic and clinical features according to disease severity, respiratory failure, and long-term outcomes

|  | Total (n=126) | Baseline severity | | | Respiratory failure | | | Long-term outcome | | |
| --- | --- | --- | --- | --- | --- | --- | --- | --- | --- | --- |
| Severe  (n=91) | Mild  (n=35) | p-value | Yes  (n=19) | No  (n=107) | p-value | Poor  (n=23) | Good  (n=103) | p-  value |
| Age | 54.8±16.3 | 56.4±16.2 | 50.7±15.7 | ns | 60.5±19.3 | 53.8±15.5 | ns | 66.0±12.0 | 52.3±16.0 | <0.001* |
| Sex (M: F) | 1.9:1  (82:44) | 1.8:1  (59:32) | 1.9:1  (23:12) | ns | 2.2:1  (13:6) | 1.8:1  (69:38) | ns | 2.8:1  (17:6) | 1.7:1  (65:38) | ns |
| Preceding event (%) | |  |  |  |  |  |  |  |  |  |
| None | 22/126(17.5) | 15/91(16.5) | 7/35(20.0) | ns | 4/19(21.1) | 18/107(16.8) | ns | 5/23(21.7) | 17/103(16.5) | ns |
| Respiratory infection | 50/126(39.7) | 36/91(39.6) | 14/35(40.0) |  | 9/19(47.4) | 41/107(38.3) |  | 4/23(17.4) | 46/103(44.7) |  |
| Gastrointestinal infection | 58/126(46.0) | 42/91(46.2) | 16/35(45.7) |  | 6/19(31.6) | 52/107(48.6) |  | 14/23(60.9) | 44/103(42.7) |  |
| Operation | 1/126(0.8) | 1/91(1.1) | 0/35(0.0) |  | 0/19(0.0) | 1/107(0.9) |  | 0/23(0.0) | 1/103(1.0) |  |
| Duration to nadir (d) | 5.9±2.9 | 6.1±2.7 | 5.4±3.2 | ns | 5.7±2.7 | 5.9±2.9 | ns | 5.4±2.2 | 6.0±3.0 | ns |
| Hospitalization duration (m) | 36.3±35.6 | 44.8±36.0 | 14.3±23.2 | <0.001* | 83.4±38.2 | 27.9±27.9 | <0.001* | 75.2±42.7 | 27.6±27.2 | <0.001* |
| Duration to IVIG (d) | 4.6±3.2 | 4.3±2.8 | 5.3±4.2 | ns | 2.7±1.6 | 4.9±3.4 | 0.006* | 3.2±2.4 | 4.9±3.3 | 0.027* |
| Treatment (%) | |  |  |  |  |  |  |  |  |  |
| IVIg | 103/126(81.7) | 73/91(80.2) | 30/35(85.7) | 0.049* | 13/19(68.4) | 90/107(84.1) | 0.000* | 15/23(65.2) | 88/103(85.4) | 0.003* |
| IVIg & steroid | 10/126(7.9) | 7/91(7.7) | 3/35(8.6) |  | 0/19(0.0) | 10/107(9.3) |  | 2/23(8.7) | 8/103(7.8) |  |
| IVIg & IVIg | 9/126(7.1) | 9/91(9.9) | 0/35(0.0) |  | 6/19(31.6) | 3/107(2.8) |  | 6/23(26.1) | 3/103(2.9) |  |
| Plasma exchange | 2/126(1.6) | 2/91(2.2) | 0/35(0.0) |  | 0/19(0.0) | 2/107(1.9) |  | 0/23(0.0) | 2/103(1.9) |  |
| None | 2/126(1.6) | 0/91(0.0) | 2/35(5.7) |  | 0/19(0.0) | 2/107(1.9) |  | 0/23(0.0) | 2/103(1.9) |  |
| Symptoms (%) | |  |  |  |  |  |  |  |  |  |
| Bulbar | 44/126(34.9) | 37/91(40.6) | 7/35(20.0) | 0.022* | 19/19(100.0) | 25/107(23.4) | <0.001* | 13/23(56.5) | 31/103(30.1) | 0.017* |
| Sensory | 94/126(74.6) | 72/91(79.1) | 22/35(62.9) | ns | 15/19(78.9) | 79/107(73.8) | ns | 17/23(73.9) | 77/103(74.8) | ns |
| Facial palsy | 23/126(18.3) | 15/91(16.5) | 8/35(22.9) | ns | 4/19(21.1) | 19/107(17.8) | ns | 3/23(13.0) | 20/103(19.4) | ns |
| Delayed facial palsy | 10/126(7.9) | 10/91(11.0) | 0/35(0.0) | 0.033* | 1/19(5.3) | 9/107(8.4) | ns | 2/23(8.7) | 8/103(7.8) | ns |
| Severe pain | 31/126(24.6) | 27/91(29.7) | 4/35(11.4) | 0.025* | 4/19(21.1) | 27/107(25.2) | ns | 7/23(30.4) | 24/103(23.3) | ns |
| GBS subtype (%) | |  |  |  |  |  |  |  |  |  |
| AMAN | 45/126(35.7) | 34/91(37.4) | 11/35(31.4) | ns | 9/19(47.4) | 36/107(33.6) | ns | 13/23(56.5) | 32/103(31.1) | 0.011* |
| AIDP | 33/126(26.2) | 26/91(28.6) | 7/35(20.0) |  | 7/19(36.8) | 26/107(24.3) |  | 8/23(34.8) | 25/103(24.3) |  |
| MFS | 22/126(17.5) | 13/91(14.3) | 9/35(25.7) |  | 1/19(5.3) | 21/107(19.6) |  | 0/23(0.0) | 22/103(21.4) |  |
| Unspecified | 26/126(20.6) | 18/91(19.7) | 8/35(22.9) |  | 2/19(10.5) | 24/107(22.4) |  | 2/23(8.7) | 24/103(23.3) |  |
| DM (%) | 19/126(15.1) | 15/91(16.5) | 4/35(11.4) | ns | 2/19(10.5) | 17/107(15.9) | ns | 5/23(21.7) | 14/103(13.6) | ns |

Abbreviations: M, male; F, female; d, day; m, month; IVIg, intravenous immunoglobulin; AMAN, acute motor axonal neuropathy; AIDP, acute inflammatory demyelinating polyneuropathy; MFS, Miller Fisher syndrome; DM, diabetes mellitus.

*, *p* value < 0.05
