# Supplementary material for: Prognostic Biomarkers in Guillain-Barré Syndrome: Lymphocyte-Based Ratio and Albumin Level
Source: Research Square preprint supplement (doi:10.21203/rs.3.rs-8784464/v1), 2026-02-24
Supplement: Supplementary file 4 [file d3d7dee8ec0e690b5569d0de.docx]

Table 2. Comparison of hematologic parameters between patients with GBS and healthy controls

| Variables | GBS patients  (n=126) | Healthy controls (n=2910) | p-value |
| --- | --- | --- | --- |
| WBC (103/uL) | 8.76±3.15 | 5.80±1.70 | 0.000** |
| Neutrophil (103/uL) | 5.90±2.82 | 3.30±1.35 | 0.000** |
| Lymphocyte (103/uL) | 2.08±0.76 | 1.90±0.60 | 0.007** |
| Monocyte (103/uL) | 0.55±0.27 | 0.41±0.14 | 0.000** |
| NLR | 3.22±1.94 | 1.88±1.06 | 0.000** |
| MLR | 0.29±0.17 | 0.23±0.09 | 0.000** |
| Albumin (g/dL) | 4.08±0.42 | 4.58±0.37 | 0.000** |

Propensity score matching was used to compare mean values ± standard deviations of laboratory parameters between patients with GBS and unmatched healthy controls. WBC, white blood cell; NLR, neutrophil-lymphocyte ratio; MLR, monocyte-lymphocyte ratio.

**, p value < 0.01
